# Supplementary material
Source: PubMed Central journal article supplement (PMC3716010)
Supplement: NIHMS481094-supplement-01.pdf [file NIHMS481094-supplement-01.pdf]

Supplementary Table S1.

| Animal               | Age (yrs.)    | Weight (kg)   | Put. Vol. ( $\mu$ l) |              |
|----------------------|---------------|---------------|----------------------|--------------|
|                      |               |               | Right                | Left         |
| R91070               | 17.3          | 5.5           | 735                  |              |
| R95106               | 13.2          | 6.1           | 819                  |              |
| R03044               | 6.0           | 4.8           | 595                  | 630          |
| R03064               | 6.0           | 4.2           | 617                  | 614          |
| R05008               | 5.0           | 3.9           | 786                  | 786          |
| Rhesus Mean $\pm$ SD | 9.5 $\pm$ 5.5 | 4.9 $\pm$ 0.9 | 710 $\pm$ 100        | 677 $\pm$ 95 |
| Cy0140               | 8.5           | 4.5           | 486                  | 477          |
| Cy0286               | 5.8           | 5.0           | 473                  | 504          |
| Cy0287               | 6.8           | 4.7           | 588                  | 577          |
| Cy0288               | 7.6           | 5.0           | 466                  | 494          |
| Cy0295               | 6.5           | 4.0           | 589                  | 563          |
| Cy0298               | 5.9           | 4.0           | 641                  | 650          |
| Cy0299               | 5.9           | 5.4           | 454                  | 465          |
| Cy0279               | 7.7           | 4.8           | 483                  | 465          |
| Cyno. Mean $\pm$ SD  | 6.8 $\pm$ 1   | 4.7 $\pm$ 0.5 | 523 $\pm$ 72         | 527 $\pm$ 80 |
